# Supplementary material for: Cystin genetic variants cause autosomal recessive polycystic kidney disease associated with altered Myc expression
Source: PubMed Central journal article supplement (PMC8440558; doi:10.1038/s41598-021-97046-4), 2021-09-14
Supplement: 41598_2021_97046_MOESM1_ESM.pdf [file 41598_2021_97046_MOESM1_ESM.pdf]

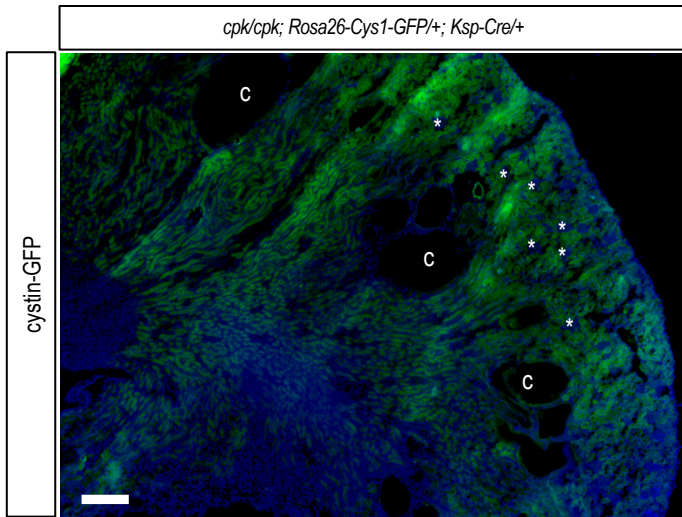

**Supplementary Figure S1. Cystin-GFP expression (green) in a 5-week-old rescue mouse kidney was observed in both cortex and medulla.** Residual cysts (c) are restricted to the cortico-medullary junction region, consistent with proximal tubule involvement. The asterisks indicate glomeruli (blue) that are entirely GFP negative, indicating that Cystin-GFP expression was mainly in distal tubular elements of the kidney (10X magnification, scale bar equals 100  $\mu$ m).

**Supplementary Figure S2 qRT-PCR analysis showing that kidney *Myc* mRNA levels in Cystin-GFP rescue mice were equivalent to WT.** Total RNA was prepared from kidneys of 14-day-old B6 WT, *cpk/cpk; Ksp-Cre/+* and *cpk/cpk; Rosa26-Cys1-GFP/+; Ksp-Cre/+* (rescue) mice using RNeasy Mini kit (Qiagen, # 74104), treated with RQ1 RNase-Free DNase (Promega, # M6101) and re-purified using RNeasy Mini kit. RNA samples were reverse transcribed with SuperScript III First-Strand Synthesis SuperMix (Thermo Fisher Scientific, # 18080400) and oligo dT primers. (q)RT-PCR was performed on a QuantStudio 7 Flex Real-Time PCR System (Thermo Fisher Scientific) running the default program, Power SYBR Green PCR Master Mix (Thermo Fisher Scientific, # 4368706), and in *c-Myc* specific primers 5'- GCC CCC AAG GTA GTG ATC CT -3' and 5'- GTG CTC GTC TGC TTG AAT GG -3'. *Peptidylpropyl isomerase A (Ppia)* expression was used for normalization (primers 5'- AGC ACT GGA GAG AAA GGA TT -3' and 5'- ATT ATG GCG TGT AAA GTC ACC A -3'). Results were analyzed using QuantStudio Real-Time PCR Software and the  $\Delta\Delta C_t$  method. The results are presented as mean  $\pm$  S.E.; N=3 per group. Significance ( $p < 0.05$ ) was confirmed by Student's t-test and One-way ANOVA.

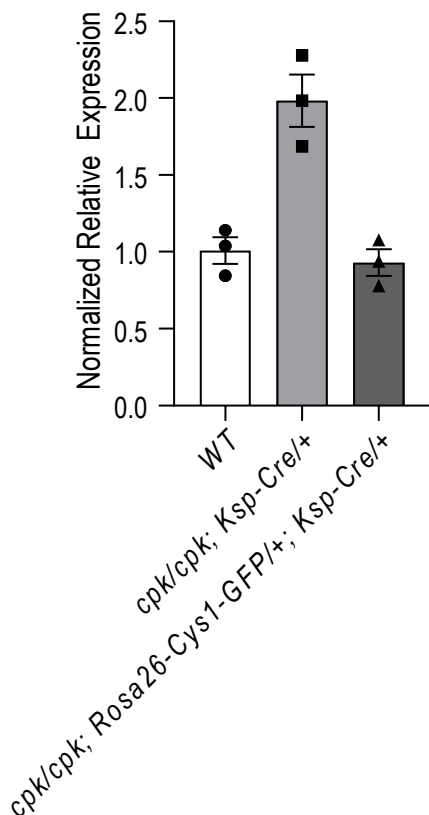

# Supplementary Figure S3

**A**

**CYS1 locus (hg19 chr2:10,220,010-10,220,350)**

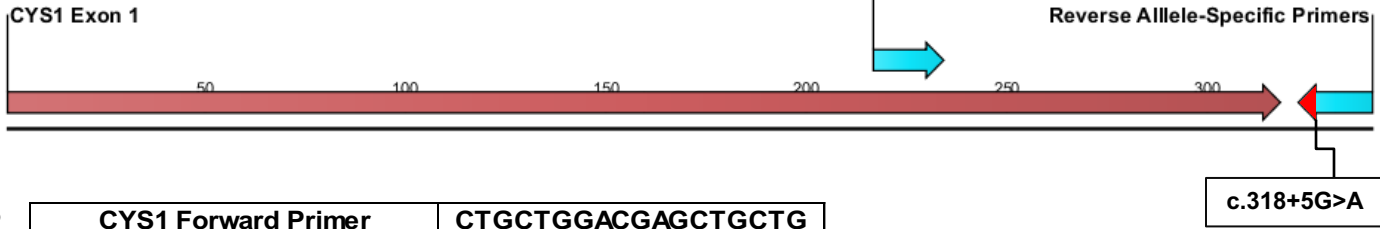

**B**

|                         |                    |
|-------------------------|--------------------|
| CYS1 Forward Primer     | CTGCTGGACGAGCTGCTG |
| CYS1 Reverse WT Primer  | GCCCTGCGGCTCCACAC  |
| CYS1 Reverse MUT Primer | GCCCTGCGGCTCCACAT  |

**C**

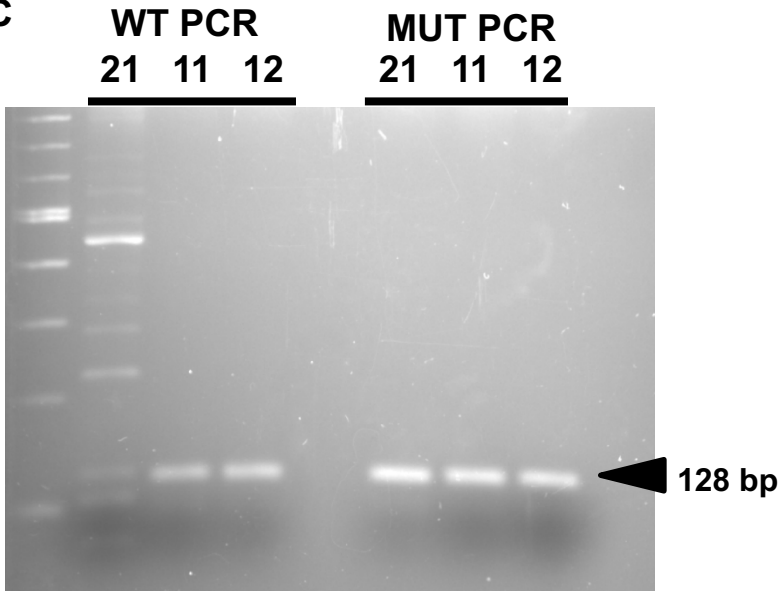

**D**

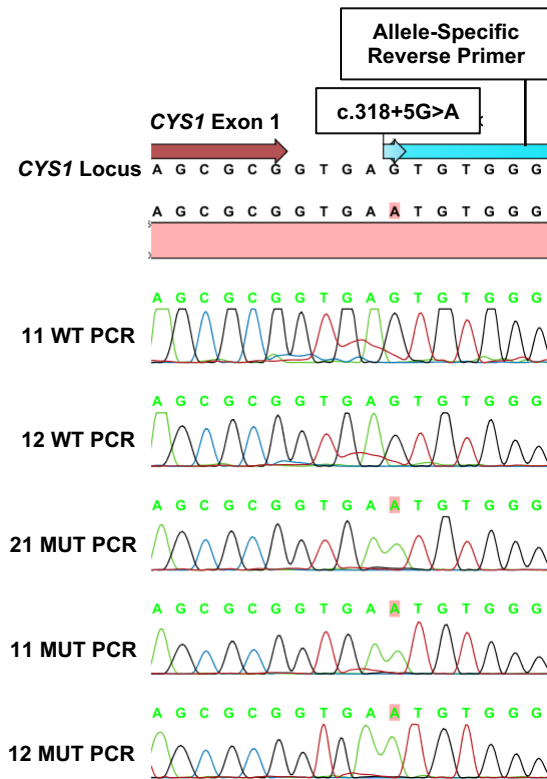

**E**

**21 WT PCR PRODUCT**

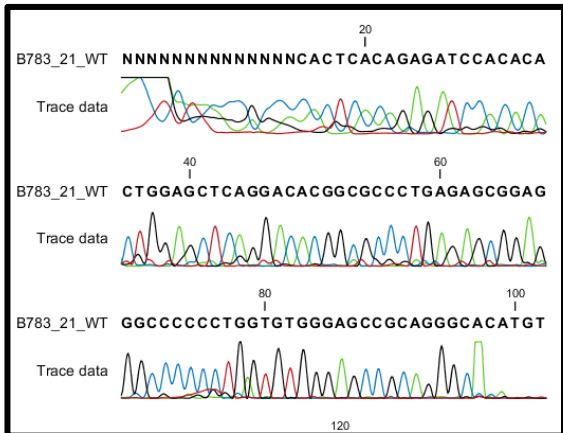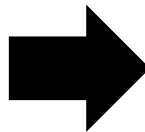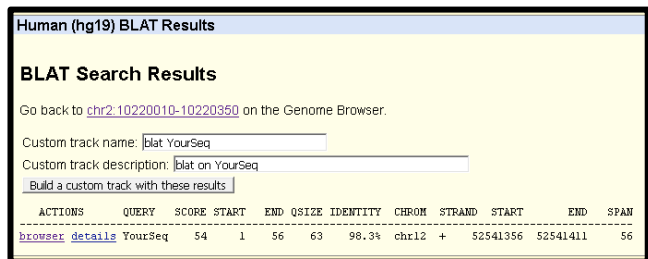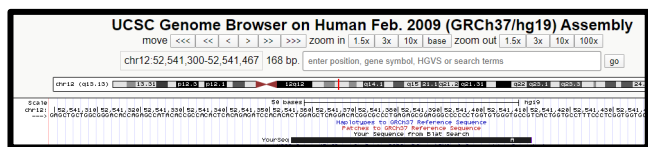

**Supplementary Figure S3. Confirmation of *CYS1* variant in family B783 with childhood onset polycystic kidney disease and liver fibrosis.** (A) Map of *CYS1* locus showing allele-specific primer PCR primer location in context of *CYS1* variant. (B) Table shows shared forward primer and allele-specific reverse primers for wildtype (WT) and mutated (MUT) nucleotide. (C) Gel electrophoresis of *CYS1* allele-specific PCR products amplified from WT and MUT alleles from proband (21), father (11), and mother (12) DNA in family B783. PCR products of the expected size (128 bp) generated from both parents for WT, while WT PCR primers yielded non-specific bands from the proband. MUT PCR yielded a single product of expected size for all three family members. These results suggest MUT allele heterozygosity for both parents and MUT homozygosity for the proband. (D) 128 bp PCR products generated in the 6 reactions in (C) were excised from the gel and Sanger sequenced. The sequences derived from the chromatograms were aligned to the *CYS1* locus as shown. The WT and MUT products from parental DNA (11 and 12) and the MUT product from the affected proband (21) were confirmed as amplification products of *CYS1*. The product from WT PCR of affected proband (21) DNA did not align. (E) Sequence chromatogram from proband WT PCR product aligned to the human genome using UCSC Browser BLAT, yielding a single search result indicating 98.3% similarity to an intron in chromosome 12. This finding supports WT PCR generating non-specific products from the proband, while parents yielded *CYS1* products. Abbreviations: 11, father; 12, mother, 21, proband; WT, wildtype; MUT, mutant.

**Supplementary Table S1. PCR conditions for mouse genotyping**

| Transgene                                                    | PCR Conditions                                                                                                                                                                     |                                                                                                     |                                                                                                                                                | Expected Band Sizes |        |
|--------------------------------------------------------------|------------------------------------------------------------------------------------------------------------------------------------------------------------------------------------|-----------------------------------------------------------------------------------------------------|------------------------------------------------------------------------------------------------------------------------------------------------|---------------------|--------|
|                                                              | Reagents                                                                                                                                                                           | Primers                                                                                             | Conditions                                                                                                                                     | Wild type           | Mutant |
| <b>Cys1</b><br>w/<br>HotStarTaq<br>PCR <sup>a</sup>          | 1x PCR buffer, 1.5 mM MgCl <sub>2</sub><br>1x Q-Solution<br>50 uM each dNTPs<br>0.4 μM each primer<br>0.025 units HotStarTaq <sup>a</sup> DNA<br>Polymerase<br>4 ng of genomic DNA | F: 5'-TCCTCCCTCCCTATCTCTCCAT-3'<br>R: 5'-ATCCAGCAGGCGTAGGGT-3'                                      | Initial denaturation: 15 min. at 95°C<br>30 cycles of: 45 sec. at 94°C<br>1 min. at 57°C<br>1 min. at 72°C<br>Final extension: 10 min. at 72°C | 351                 | 315    |
| <b>Ksp-Cre</b><br>w/<br>HotStarTaq<br>PCR <sup>a</sup>       | 1x PCR buffer, 1.5 mM MgCl <sub>2</sub><br>1x Q-Solution<br>50 uM each dNTPs<br>0.4 μM each primer<br>0.025 units HotStarTaq <sup>a</sup> DNA<br>Polymerase<br>4 ng of genomic DNA | F: 5'-GCAGATCTGGCTCTCCAAAG-3'<br>R: 5'-AGGCAAATTTTGGTGTACGG-3'                                      | Initial denaturation: 15 min. at 95°C<br>30 cycles of: 45 sec. at 94°C<br>1 min. at 55°C<br>1 min. at 72°C<br>Final extension: 10 min. at 72°C | n/a                 | 420    |
| <b>Rosa 26</b><br>w/<br>iProof HF<br>Master Mix <sup>b</sup> | 1x iProof HF Master Mix <sup>b</sup><br>2% DMSO (Bio-Rad)<br>0.4 μM each primer<br>4 ng of genomic DNA                                                                             | F: 5'-CTCGTGATCTGCAACTCCAG-3'<br>R: 5'-GCTGCATAAAACCCAGATGACT-3'<br>R: 5'-GCGCATGCTCCAGACTGCCTTG-3' | Initial denaturation: 30 sec. at 98°C<br>35 cycles of: 30 sec. at 98°C<br>30 sec. at 61°C<br>1 min. at 72°C<br>Final extension: 5 min. at 72°C | 225                 | 319    |

<sup>a</sup> HotStarTaq PCR (cat#: 203205, QIAGEN)  
<sup>b</sup> iProof HF Master Mix (cat#1725310, BIO-RAD)

## Supplementary Data

### Minigene splicing assay

#### 1. Amplicon analysis\*

|                    | Cloned inserts <sup>#</sup> | Restriction digest <sup>&amp;</sup> | Successful sequencing <sup>**</sup> | Result                                                                 |
|--------------------|-----------------------------|-------------------------------------|-------------------------------------|------------------------------------------------------------------------|
| pSpliceExpress     | 7/8                         | 5/5                                 | 2/2                                 | Both clones match expected sequence                                    |
| CYS1-ex2           | 6/8                         | 6/6                                 | 2/3                                 | Both clones match expected sequence                                    |
| CYS1-ex1DNR-ex2    | 5/8                         | 5/5                                 | 1/2                                 | Clone matches expected sequence                                        |
| CYS1-ex1DNRMUT-ex2 | 5/8                         | 5/5                                 | 2/2                                 | Both clones correspond to use of same alternative donor/acceptor sites |

\*Amplicon DNA bands were purified from gel (see Fig. 6C) and cloned. <sup>#</sup>Presence of cloned insert tested by PCR (using Fwd and Rev primers, see Fig. 6); results presented as number positive/total clones tested. <sup>&</sup>Cloned plasmid DNA analyzed by restriction enzyme digestion. Results presented as number with identical digestion pattern/total number tested. <sup>\*\*</sup>Multiple clones from each amplicon band underwent sequencing. Results presented as number of successful reads/number of clones sequenced.

2. Amplicon cDNA sequencing results. Primer sequences are underlined. Exon A (vector) is highlighted in green, exon B (vector) is highlighted in blue, *CYS1* exon 1 sequence is highlighted in yellow, and *CYS1* exon 2 is highlighted in purple.

>pSpliceExpress\_a1

CTGCTCATCCTCTGGGAGCCCCGCCCTGCCAGGCTTTTGTCAAACAGCACCTTTG  
TGTTTCTCACTTGGTGGAAAGCTCTCTACCTGGTGTGTGGGGAGCGTGGATTCTTCT  
ACACACCCATGTCCCGCCGCGAAGTGGAGGACCCACAAGTGGCACAACCTGGAGCT  
GGGTGGAGGCCCGTGACCTTCAGACCT

>pSpliceExpress\_a2

CTGCTCATCCTCTGGGAGCCCCGCCCTGCCAGGCTTTTGTCAAACAGCACCTTTG  
TGTTTCTCACTTGGTGGAAAGCTCTCTACCTGGTGTGTGGGGAGCGTGGATTCTTCT  
ACACACCCATGTCCCGCCGCGAAGTGGAGGACCCACAAGTGGCACAACCTGGAGCT  
GGGTGGAGGCCCGTGACCTTCAGACCT

>CYS1-ex2\_b2

CTGCTCATCCTCTGGGAGCCCCGCCCTGCCAGGCTTTTGTCAAACAGCACCTTTG  
TGTTTCTCACTTGGTGGAAAGCTCTCTACCTGGTGTGTGGGGAGCGTGGATTCTTCT  
ACACACCCATGTCCCGCCGCGAAGTGGAGGACCCCAAGGTGTGCGCAGAGCAG  
AGCACAGAGGGCCACCCGGGGAGCGGCAATGTCTCTGATGGCACAACCTGGAGCT  
GGGTGGAGGCCCGTGACCTTCAACCT

>CYS1-ex2\_b5

CTGCTCATCCTCTGGGAGCCCCGCCCTGCCAGGCTTTTGTCAAACAGCACCTTTG  
TGTTTCTCACTTGGTGGAAAGCTCTCTACCTGGTGTGTGGGGAGCGTGGATTCTTCT  
ACACACCCATGTCCCGCCGCGAAGTGGAGGACCCACAAGGTGTGCGCAGAGCAG  
AGCACAGAGGGCCACCCGGGGAGCGGCAATGTCTCTGATGGCACAACCTGGAGCT  
GGGTGGAGGCCCGTGACCTTCAACCT

>CYS1-ex1DNR-ex2\_c7

CTGCTCATCCTCTGGGAGCCCCGCCCTGCCAGGCTTTTGTCAAACAGCACCTTTG  
 TGGTTCTCACTTGGTGGAAAGCTCTCTACCTGGTGTGTGGGGAGCGTGGATTCTTCT  
 ACACACCCATGTCCCGCCGCGCGGGTCTGCGGGGAGCGCGGTGTGCGCAGAGCAG  
 AGCACAGAGGGCCACCCGGGGAGCGGCAATGTCTCTGATGGCACAACCTGGAGCT  
 GGGTGGAGGGCCCGTGACCTTCAGACC

>CYS1-ex1DNRMUT-ex2\_d1

CTGCTCATCCTCTGGGAGCCCCGCCCTGCCAGGCTTTTGTCAAACAGCACCTTTG  
 TGGTTCTCACTTGGTGGAAAGCTCTCTACCTGGTGTGCGCAGAGCAGAGCACAGAG  
 GGCCACCCGGGGAGCGGCAATGTCTCTGATGGCACAACCTGGAGCTGGGTGGAGG  
 CCCGTGACCTTCAGACCT

>CYS1-ex1DNRMUT-ex2\_d2

CTGCTCATCCTCTGGGAGCCCCGCCCTGCCAGGCTTTTGTCAAACAGCACCTTTG  
 TGGTTCTCACTTGGTGGAAAGCTCTCTACCTGGTGTGCGCAGAGCAGAGCACAGAG  
 GGCCACCCGGGGAGCGGCAATGTCTCTGATGGCACAACCTGGAGCTGGGTGGAGG  
 CCCGTGACCTTCAGACCT

3. Schematic illustrating splicing pattern that yielded *CYS1-ex1DNRMUT-ex2* amplicon.

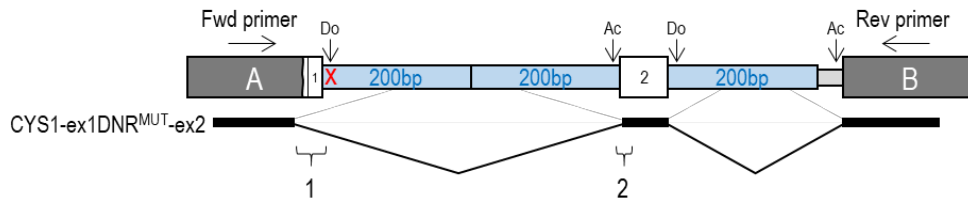

1. Missing 59 bp including CYS1 exon 1 donor site
2. Missing 5 bp of 5' end of CYS1 exon 2

Alignment of *CYS1-ex1DNR-ex2\_c7* and *CYS1-ex1DNRMUT-ex2\_d1* & *d2* amplicon sequences.

|             |            |            |                                   |
|-------------|------------|------------|-----------------------------------|
|             | 1          |            | 50                                |
| CYS1ex1-ex2 | CTGCTCATC  | CTCTGGGAGC | CCCCGCCCTGC CCAGGCTTTT GTCAAACAGC |
| c7          | CCTGCTCATC | CTCTGGGAGC | CCCGCCCTGC CCAGGCTTTT GTCAAACAGC  |
| d1          | CCTGCTCATC | CTCTGGGAGC | CCCGCCCTGC CCAGGCTTTT GTCAAACAGC  |
| d2          | CCTGCTCATC | CTCTGGGAGC | CCCGCCCTGC CCAGGCTTTT GTCAAACAGC  |
|             | 51         |            | 100                               |
| CYS1ex1-ex2 | ACCTTTGTGG | TTCTCACTTG | GTGGAAGCTC TCTACCTGGT GTGTGGGGAG  |
| c7          | ACCTTTGTGG | TTCTCACTTG | GTGGAAGCTC TCTACCTGGT GTGTGGGGAG  |
| d1          | ACCTTTGTGG | TTCTCACTTG | GTGGAAGCTC TCTACCTGGT GTG.....    |
| d2          | ACCTTTGTGG | TTCTCACTTG | GTGGAAGCTC TCTACCTGGT GTG.....    |
|             | 101        |            | 150                               |
| CYS1ex1-ex2 | CGTGGATTCT | TCTACACACC | CATGTCCCGC CGCCGGGTC GCGGGGAGCG   |
| c7          | CGTGGATTCT | TCTACACACC | CATGTCCCGC CGCCGGGTC GCGGGGAGCG   |
| d1          | .....      | .....      | .....                             |
| d2          | .....      | .....      | .....                             |
|             | 151        |            | 200                               |
| CYS1ex1-ex2 | CGGTGTGCGC | AGAGCAGAGC | ACAGAGGGCC ACCCGGGGAG CGGCAATGTC  |
| c7          | CGGTGTGCGC | AGAGCAGAGC | ACAGAGGGCC ACCCGGGGAG CGGCAATGTC  |
| d1          | .....CGC   | AGAGCAGAGC | ACAGAGGGCC ACCCGGGGAG CGGCAATGTC  |
| d2          | .....CGC   | AGAGCAGAGC | ACAGAGGGCC ACCCGGGGAG CGGCAATGTC  |
|             | 201        |            | 249                               |
| CYS1ex1-ex2 | TCTGATGGCA | CAACTGGAGC | TGGGTGGAGG CCCGTGACCT TCAGACCT.   |
| c7          | TCTGATGGCA | CAACTGGAGC | TGGGTGGAGG CCCGTGACCT TCAGACCT..  |
| d1          | TCTGATGGCA | CAACTGGAGC | TGGGTGGAGG CCCGTGACCT TCAGACCTA   |
| d2          | TCTGATGGCA | CAACTGGAGC | TGGGTGGAGG CCCGTGACCT TCAGACCT.   |

A 6 nt repeat (GGTGTG, marked with asterisks in the alignment) is present at the sites of alternative splicing in amplicons CYS1-ex1DNRMUT-ex2\_d1 & d2. The possible alternative donor-acceptor pairings are therefore TG-TG, GT-GT, TG-GG, GT-CG, or GG-GC.



Corresponds to Figure 1D

### IB: Cystin (70053)

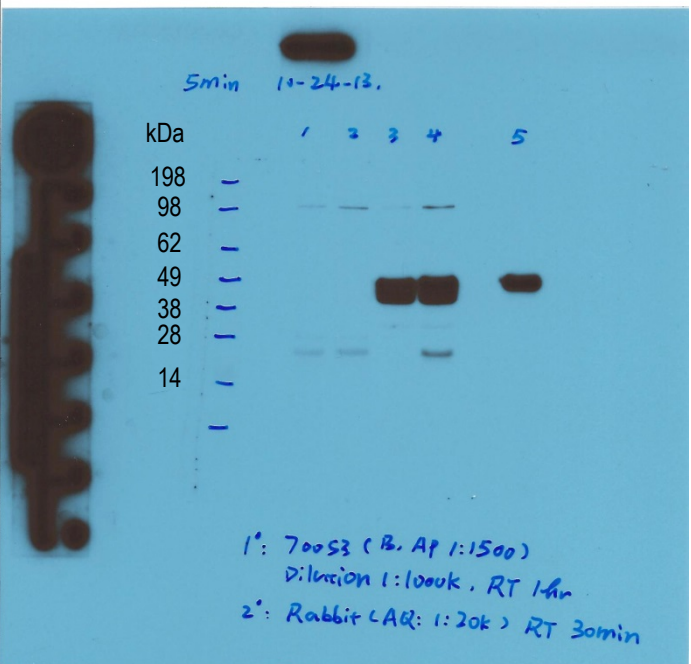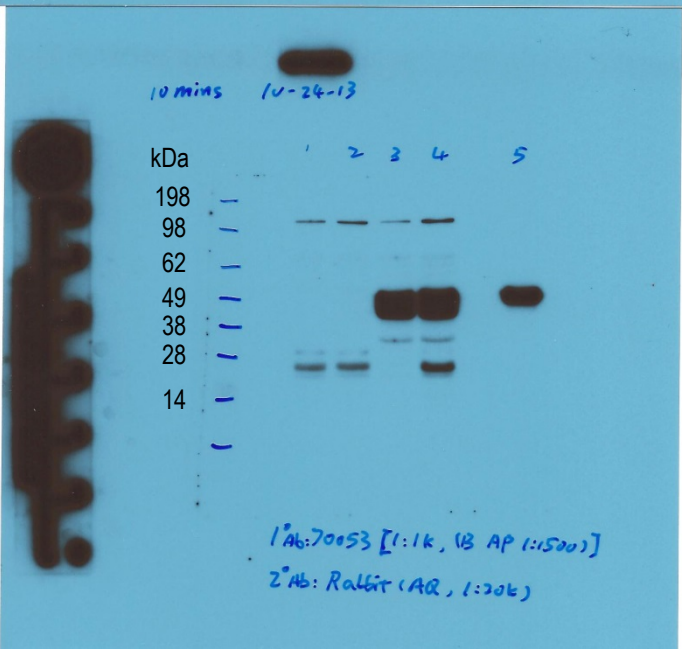

### IB: GAPDH

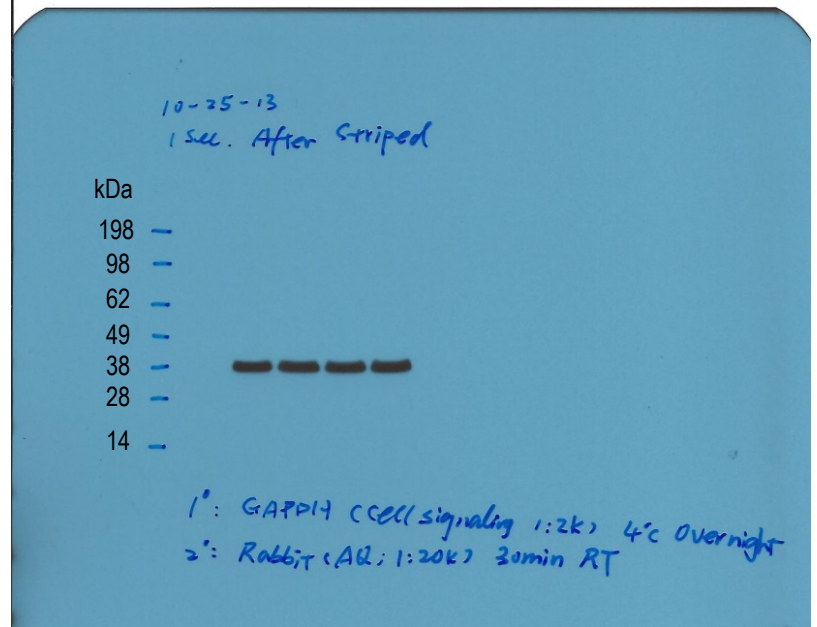

Corresponds to Figure 4A

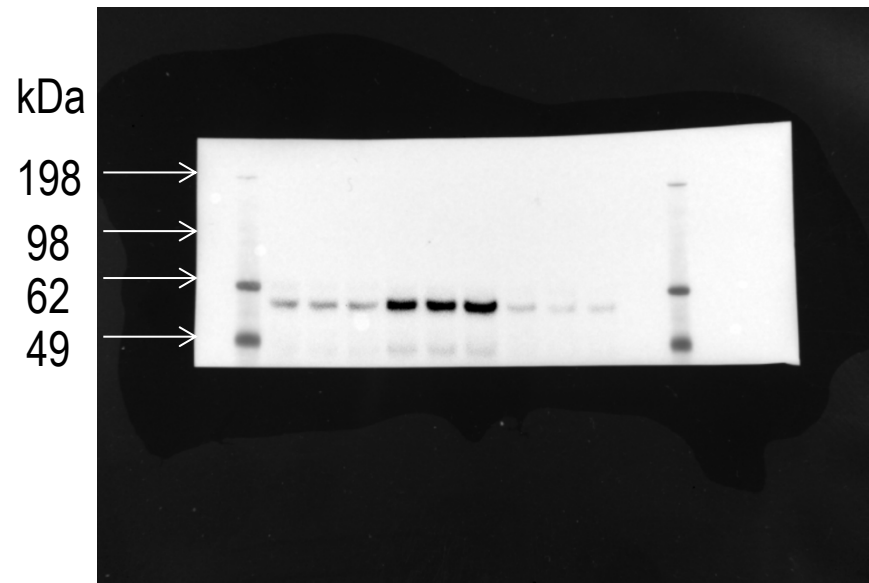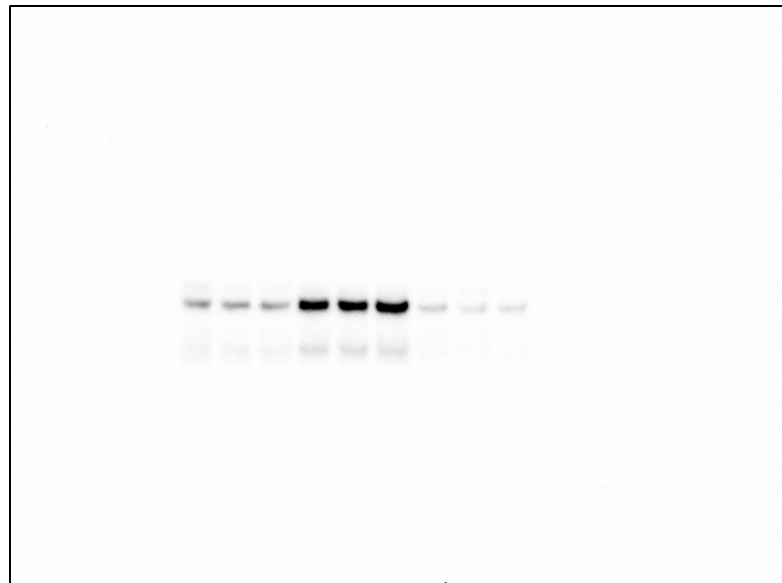

IB: c-Myc

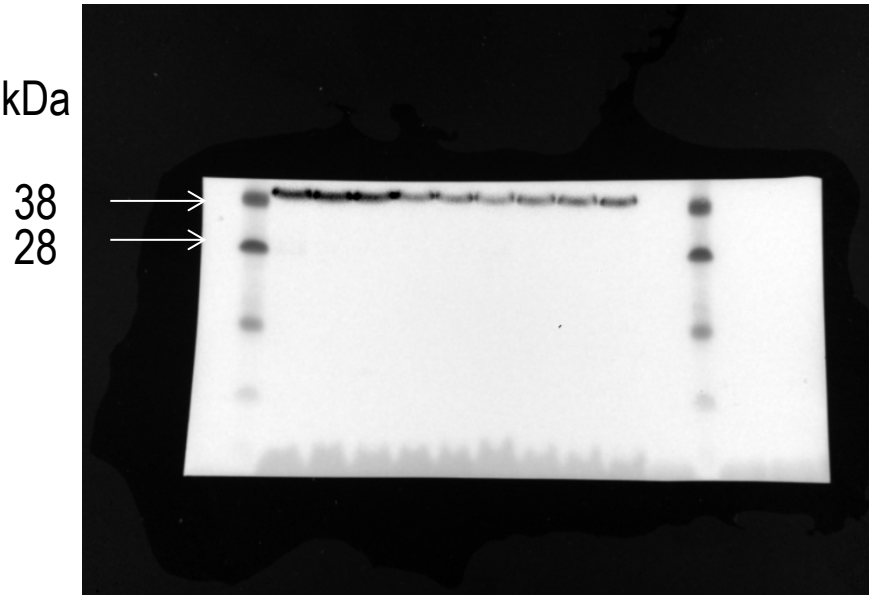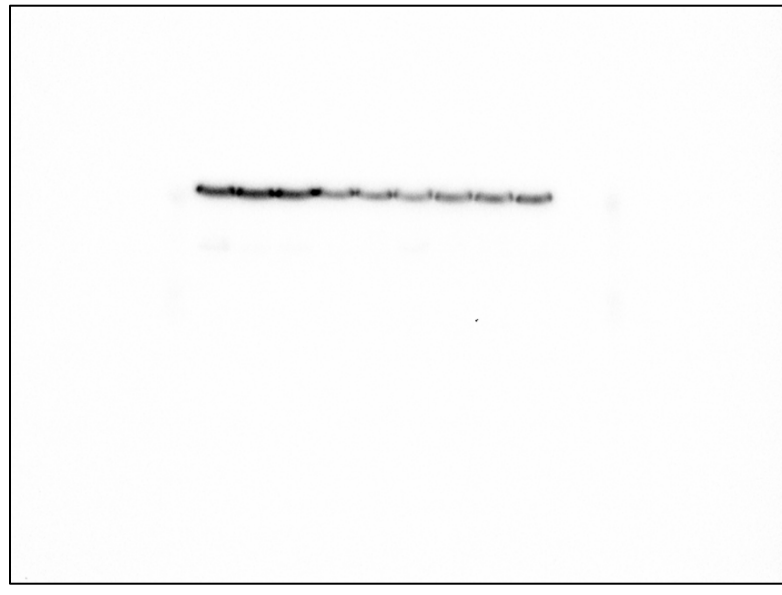

IB: GAPDH
