# Supplementary material for: Cystin genetic variants cause autosomal recessive polycystic kidney disease associated with altered Myc expression
Source: PubMed Central journal article supplement (PMC8440558; doi:10.1038/s41598-021-97046-4), 2021-09-14
Supplement: 41598_2021_97046_MOESM2_ESM.pdf [file 41598_2021_97046_MOESM2_ESM.pdf]

Corresponds to Figure 1B

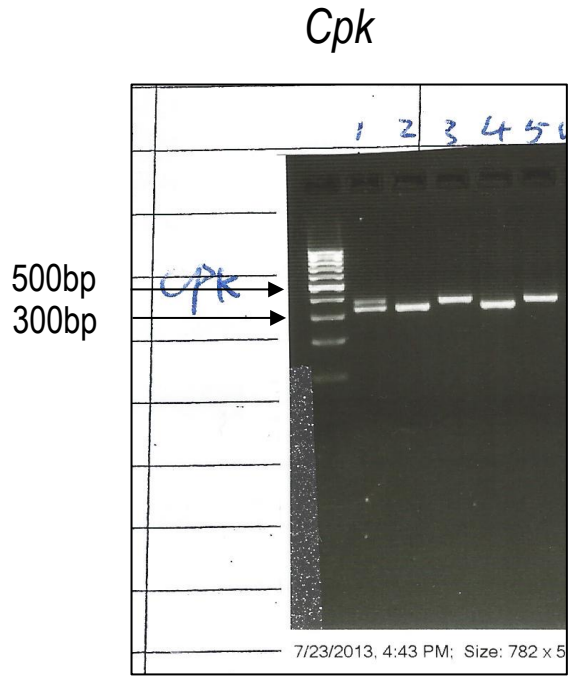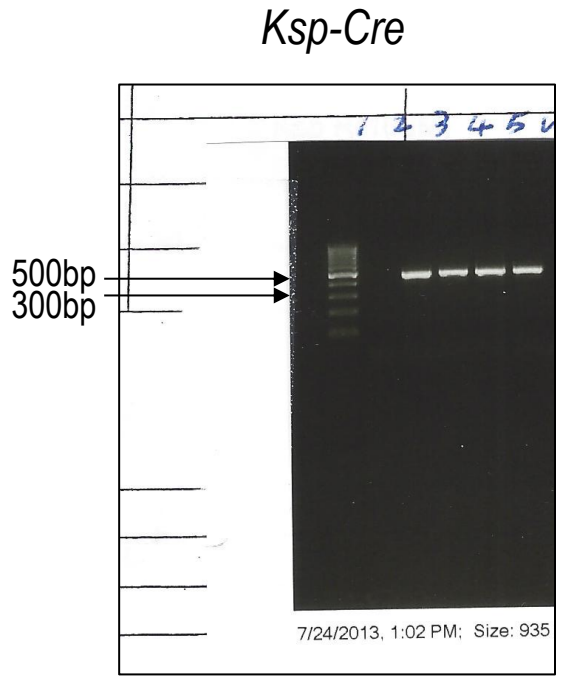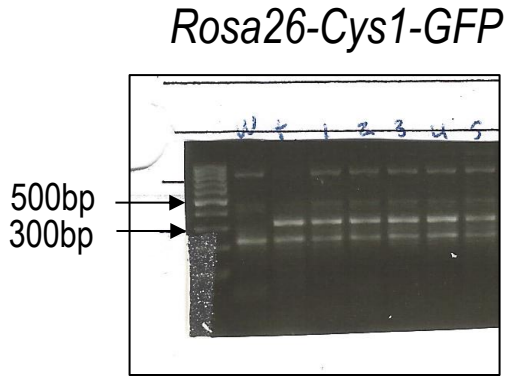

Note: Sample # 1-5 correspond to Lane 1-5 in Figure 1B
